# Supplementary material for: Novel Brominated Flame Retardants in Dust from E-Waste-Dismantling Workplace in Central China: Contamination Status and Human Exposure Assessment
Source: MDPI journal article supplement (doi:10.3390/toxics11010058), 2023-01-06
Supplement: s1 [file s1]

**Supplementary Information**

**Novel Brominated Flame Retardants in Dust from  
E-Waste-Dismantling Workplace in Central China:  
Contamination Status and Human Exposure  
Assessment**

**Xuelin Li, Yu Wang \*, Wenbin Bai, Qiuyue Zhang, Leicheng Zhao, Zhipeng Cheng, Hongkai Zhu  
and Hongwen Sun**

MOE Key Laboratory of Pollution Processes and Environmental Criteria, College of  
Environmental Science and Engineering, Nankai University, Tianjin 300350, China

\* Correspondence: [yu.wang@nankai.edu.cn](mailto:yu.wang@nankai.edu.cn)

*Number of pages: 14*

*Number of tables: 9*

## Contents

|                                                                                                                                 |    |
|---------------------------------------------------------------------------------------------------------------------------------|----|
| Section S1. Chemicals .....                                                                                                     | 3  |
| Section S2. Sample collection.....                                                                                              | 3  |
| Table S1. Chemical properties of target NBFRs and HBCDs compounds.....                                                          | 4  |
| Table S2. Instrument performance, method detection limits (MDLs), and matrix spike recoveries of HBCDs and NBFRs analysis. .... | 6  |
| Table S3. The parameters for the estimated daily intake and hazard quotient calculation.....                                    | 7  |
| Table S4. The occurrence of NBFRs in dust samples from e-waste dismantling area and residential environment.....                | 8  |
| Table S5. Component matrix of principal component analysis. ....                                                                | 10 |
| Table S6. The estimated daily intake of NBFRs and HBCDs via dust ingestion pathway (ng/kg bw/d).....                            | 11 |
| Table S7. The estimated daily intake of NBFRs and HBCDs via dust inhalation pathway (ng/kg bw/d).....                           | 12 |
| Table S8. The estimated daily intake of NBFRs and HBCDs via dust dermal contact pathway (ng/kg bw/d).....                       | 13 |
| Table S9. The calculated hazard quotients for NBFRs and HBCDs .....                                                             | 14 |

## Section S1. Chemicals

Six NBFRs including 2,3,4,5,6-pentabromotoluene (PBT), hexabromobenzene (HBBZ), pentabromoethylbenzene (PBEB), 1,2-bis(2,4,6-tribromophenoxy)ethane (BTBPE), 2-ethylhexyl 2,3,4,5-tetrabromobenzoate (EHTBB), bis(2-ethylhexyl)-3,4,5,6-tetrabromophthalate (BEHTBP), as well as hexabromocyclododecane ( $\alpha$ -HBCD,  $\beta$ -HBCD,  $\gamma$ -HBCD) was analyzed. The surrogate standards of  $^{13}\text{C}_6$ -HBBZ,  $\text{d}_{34}$ -BEHTBP, and  $\text{d}_{18}$ -HBCDs were used. The data obtained from previous studies (Zhang et al., 2021, Zhao et al., 2022) on organophosphate flame retardants including tris (2-chloroethyl) phosphate (TCEP), triphenyl phosphate (TPHP), tris(2,4-di-tert-butylphenyl) phosphate (AO168=O), bis(2,4-di-tert-butylphenyl) pentaerythritol diphosphate (AO626=O<sub>2</sub>), trisnonylphenol phosphate (TNPP) and nitrogenous flame retardants including melamine (MEL) and its derivatives melamine (CYA), aminoyl (AMD) and ammeline (AMN) were also included in this study.

## Section S2. Sample collection

Totally 50 dust samples were collected from an e-waste dismantling area (280,000 m<sup>2</sup>, dismantling amount > 100,000 sets/day) in Central China from October to November 2020. The studied area included four sampling sections, namely dismantling workshop 1 (DW1) for phones, computers, and televisions, dismantling workshop 2 (DW2) for washing machines and refrigerators, workshop outdoor (WO), and residential area outdoor (RAO). The dust samples were collected by soft-bristled brush and vacuum cleaner (Deerma, DX901, 12 Kpa) with 25  $\mu\text{m}$  pore size nylon sock to prevent cross-contamination. All the sampling tools are cleaned by methanol twice before use. After collection, all dust samples were wrapped in aluminum foil, sealed in individual bags, sent to the laboratory in 24 h, sieved by a pre-cleaned 100  $\mu\text{m}$  mesh sieve, and stored at -20°C for further analysis.

Table S1. Chemical properties of target NBFRs and HBCDs compounds.

| Chemicals                                        | Abbr.         | CAS#        | M.W.   | Formula                                                        | Chemical structure                                                                   | Solubility<br>(mg/L) 25<br>°C | Vapor pressure<br>at 25°C<br>(mmHg) | Log $K_{ow}$ | log $K_{oc}$ | log $K_{oa}$ | Half-life time (h)<br>(Level III<br>Fugacity Model;<br>Air/Water/Soil/S<br>ediment) | Daphnia<br>magna<br>LC <sub>50</sub> (48hr)<br>-Log10<br>(mol/L) |
|--------------------------------------------------|---------------|-------------|--------|----------------------------------------------------------------|--------------------------------------------------------------------------------------|-------------------------------|-------------------------------------|--------------|--------------|--------------|-------------------------------------------------------------------------------------|------------------------------------------------------------------|
| $\alpha$ -HBCD                                   |               |             |        |                                                                |                                                                                      |                               |                                     |              |              |              |                                                                                     |                                                                  |
| 1,2,5,6,9,10-<br>Hexabromocyclododecane          | $\beta$ -HBCD | 3194-55-6   | 641.70 | C <sub>12</sub> H <sub>18</sub> Br <sub>6</sub>                | 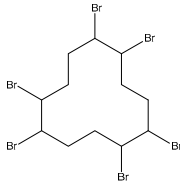   | 8.60E-03                      | 5.25E-07                            | 7.74         | 6.717        | 10.466       | 51.2/1.44E3/2.88<br>E3/1.3E4                                                        | 2.45                                                             |
| $\gamma$ -HBCD                                   |               |             |        |                                                                |                                                                                      |                               |                                     |              |              |              |                                                                                     |                                                                  |
| 1,2-Bis(2,4,6-<br>tribromophenoxy)ethane         | BTBPE         | 37853-59-1  | 687.64 | C <sub>14</sub> H <sub>8</sub> Br <sub>6</sub> O <sub>2</sub>  |    | 0.20                          | 3.49E-09                            | 9.15         | 6.098        | 15.674       | 17.3/4.32E3/8.64<br>E3/3.89E4                                                       | /                                                                |
| 2-Ethylhexyl-<br>2,3,4,5-tetrabromobenzoate      | EHTBB         | 183658-27-7 | 549.92 | C <sub>15</sub> H <sub>18</sub> Br <sub>4</sub> O <sub>2</sub> |  | 1.11E-02                      | 1.13E-07                            | 8.75         | 5.699        | 12.335       | 23.5/1.44E3/2.88<br>E3/1.3E4                                                        | 3.38                                                             |
| Bis(2-ethylhexyl-<br>3,4,5,6-tetrabromophthalate | BEHTBP        | 26040-51-7  | 706.14 | C <sub>24</sub> H <sub>34</sub> Br <sub>4</sub> O <sub>4</sub> |  | 9.19E-03                      | 1.50E-08                            | 11.95        | 7.404        | 16.864       | 11.8/1.44E3/2.88<br>E3/1.3E4                                                        | 3.06                                                             |

| Chemicals                           | Abbr. | CAS#    | M.W.   | Formula                                       | Chemical structure                                                                 | Solubility<br>(mg/L) 25<br>°C | Vapor pressure<br>at 25°C<br>(mmHg) | Log $K_{ow}$ | log $K_{oc}$ | log $K_{oa}$ | Half-lfe time (h)<br>(Level III<br>Fugacity Model;<br>Air/Water/Soil/S<br>ediment) | Daphnia<br>magna<br>LC <sub>50</sub> (48hr)<br>-Log10<br>(mol/L) |
|-------------------------------------|-------|---------|--------|-----------------------------------------------|------------------------------------------------------------------------------------|-------------------------------|-------------------------------------|--------------|--------------|--------------|------------------------------------------------------------------------------------|------------------------------------------------------------------|
| Pentabromoet<br>hylbenzene          | PBEB  | 85-22-3 | 500.65 | C <sub>8</sub> H <sub>5</sub> Br <sub>5</sub> | 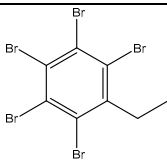 | 2.94E-03                      | 2.97E-07                            | 7.84         | 6.491        | 9.970        | 223/4.32E3/8.64<br>E3/3.89E4                                                       | 4.17                                                             |
| 2,3,4,5,6-<br>Pentabromot<br>oluene | PBT   | 87-83-2 | 486.62 | C <sub>7</sub> H <sub>3</sub> Br <sub>5</sub> |  | 1.67E-02                      | 5.68E-06                            | 6.99         | 6.066        | 9.602        | 1.39E3/4.32E3/8.<br>64E3/3.89E4                                                    | /                                                                |
| Hexabromob<br>enzene                | HBBZ  | 87-82-1 | 551.49 | C <sub>6</sub> Br <sub>6</sub>                |  | 1.60E-04                      | 1.38E-06                            | 6.07         | 5.268        | 9.126        | 2.24E4/4.32E3/8.<br>64E3/3.89E4                                                    | 3.52                                                             |

All the predicted data are generated using the US Environmental Protection Agency's EPI Suite™ (<https://www.epa.gov/tsca-screening-tools>); Kow (Octanol-Water Partition Coefficient, KOWWIN v1.69); Koc (Soil Adsorption Coefficient, KOCWIN v2.00); Koa (Octanol-Air Partition Coefficient, KOAWIN v1.10); Vapor pressure (MPBPVP v1.43, Modified Grain method); Water solubility (WSKOW v1.42); LC50 were assessed by T.E.S.T tool ([Toxicity Estimation Software Tool, https://www.epa.gov/chemical-research/toxicity-estimation-software-tool-test](https://www.epa.gov/chemical-research/toxicity-estimation-software-tool-test))

Table S2. Instrument performance, method detection limits (MDLs), and matrix spike recoveries of HBCDs and NBFRs analysis.

| Target Compounds    | Quantitative ion | Retention time (min) | Surrogate standards     | Linearity range (ng/g) (R <sup>2</sup> ) | Procedure blank (ng) | Matrix spiked Recovery % (SD %) (100 ng/g) | MDL (ng/g) |
|---------------------|------------------|----------------------|-------------------------|------------------------------------------|----------------------|--------------------------------------------|------------|
| HBBZ                | 551.5            | 6.76                 | 13C6-HBBZ               | 1-450 (0.9984)                           | 0.00                 | 86.46 (7.6)                                | 2.90       |
| EHTBB               | 356.7            | 8.02                 | 13C6-HBBZ               | 1-450 (0.9760)                           | 15.4                 | 97.85 (15.7)                               | 0.74       |
| BEHTBP              | 383.7            | 11.26                | d34-BEHTBP              | 1-450 (0.9987)                           | 7.34                 | 106.23 (6.1)                               | 5.14       |
| PBT                 | 81               | 6.02                 | 13C6-HBBZ               | 1-450 (0.9893)                           | 7.72                 | 103.41(6.0)                                | 0.02       |
| PBEB                | 81               | 6.23                 | 13C6-HBBZ               | 1-450 (0.9876)                           | 8.39                 | 103.53 (5.2)                               | 0.53       |
| BTBPE               | 81               | 11.16                | d34-BEHTBP              | 1-450 (0.9868)                           | 11.1                 | 92.97 (10.7)                               | 2.05       |
| (-)- $\alpha$ -HBCD | 640.6→80.9       | 5.95                 | (-)-d18- $\alpha$ -HBCD | 1.5-200 (0.9993)                         | 3.22                 | 97.91 (1.7)                                | 0.26       |
| (-)- $\beta$ -HBCD  | 640.6→80.9       | 6.36                 | (-)-d18- $\beta$ -HBCD  | 1.5-200 (0.9976)                         | 3.89                 | 101.41 (1.9)                               | 0.87       |
| (+)- $\alpha$ -HBCD | 640.6→80.9       | 6.77                 | (+)-d18- $\alpha$ -HBCD | 1.5-200 (0.9972)                         | 3.94                 | 98.25 (4.2)                                | 0.18       |
| (+)- $\beta$ -HBCD  | 640.6→80.9       | 7.18                 | (+)-d18- $\beta$ -HBCD  | 1.5-200 (0.9988)                         | 2.84                 | 101.64 (2.7)                               | 0.26       |
| (+)- $\gamma$ -HBCD | 640.6→80.9       | 7.67                 | (+)-d18- $\gamma$ -HBCD | 1.5-200 (0.9995)                         | 3.05                 | 101.98 (4.9)                               | 0.36       |
| (-)- $\gamma$ -HBCD | 640.6→80.9       | 9.97                 | (-)-d18- $\gamma$ -HBCD | 1.5-200 (0.9994)                         | 1.66                 | 102.18 (1.2)                               | 2.88       |

Table S3. The parameters for the estimated daily intake and hazard quotient calculation.

| Parameters               | Abbr.                    | Unit                                | Values               |                      | Reference                          |
|--------------------------|--------------------------|-------------------------------------|----------------------|----------------------|------------------------------------|
|                          |                          |                                     | Male                 | Female               |                                    |
| Ingestion rates          | IR <sub>ingestion</sub>  | mg d <sup>-1</sup>                  | 20                   | 20                   | (USEPA, 2011)                      |
| Inhalation rates         | IR <sub>inhalation</sub> | m <sup>3</sup> d <sup>-1</sup>      | 13.3                 | 13.3                 | (USEPA, 2011)                      |
| Exposure frequency       | EF                       | min d <sup>-1</sup>                 | 480* (workshop)      | 480* (workshop)      | (CRAES, 2015)                      |
|                          |                          |                                     | 163 (outdoor)        | 111 (outdoor)        |                                    |
| Absorbed fraction        | ABS                      | unitless                            | 0.03                 | 0.03                 | (USEPA, 2011)                      |
| Skin surface area        | SA                       | cm <sup>2</sup>                     | 4600                 | 4200                 | (CRAES, 2015)                      |
| Adherence factor         | AF                       | mg cm <sup>-2</sup> d <sup>-1</sup> | 0.096                | 0.096                | (USEPA, 2011)                      |
| Particle emission factor | PEF                      | m <sup>3</sup> kg <sup>-1</sup>     | 1.36×10 <sup>9</sup> | 1.36×10 <sup>9</sup> | (USEPA, 2011)                      |
| Body weight              | BW                       | kg                                  | 66.1                 | 57.8                 | (CRAES, 2015)                      |
| Conversion factor 1      | CF <sub>1</sub>          |                                     | 0.001                | 0.001                | (CRAES, 2015)                      |
| Conversion factor 2      | CF <sub>2</sub>          |                                     | 1000                 | 1000                 | (CRAES, 2015)                      |
| <b>Reference dose</b>    |                          |                                     |                      |                      |                                    |
| HBBZ                     | Rfd                      | ng/kg bw/d                          | 100                  |                      | Integrated Risk Information System |
| EHTBB                    |                          |                                     | 20000                |                      |                                    |
| BEHTBP                   |                          |                                     | 20000                |                      |                                    |
| PBT                      |                          |                                     | 100                  |                      |                                    |
| PBEB                     |                          |                                     | 100                  |                      |                                    |
| BTBPE                    |                          |                                     | 243000               |                      |                                    |
| α-HBCD                   |                          |                                     | 200000               |                      |                                    |
| β-HBCD                   |                          |                                     | 200000               |                      |                                    |
| γ-HBCD                   |                          |                                     | 200000               |                      |                                    |

\*The EF of worker in workshop was set as 480 min/day (8 working hours per day) for both male and female workers.

RfD values are all from Integrated Risk Information System (IRIS) in EPA (<https://www.epa.gov/ncea/iris/index.html>).

Table S4. The occurrence of NBFRs in dust samples from e-waste dismantling area and residential environment

| Area                  | Sampling time | Matrix (units)                             | Median concentration |       |        |      |       |       | Reference               |
|-----------------------|---------------|--------------------------------------------|----------------------|-------|--------|------|-------|-------|-------------------------|
|                       |               |                                            | HBBZ                 | EHTBB | BEHTBP | PBT  | PBEB  | BTBPE |                         |
| Central China         | 2020          | E-waste workshop dust (ng/g)               | 12.0                 | 10.6  | 96.5   | 7.83 | 1.04  | 9.30  | This study              |
| Guiyu, South China    | 2020          | E-waste sediment (ng/g, mean)              | 4.74                 | 4.74  | -      | 4.74 | 0.362 | 830   | (Ling et al., 2022)     |
| Taizhou, East China   | 2018          | E-waste Water (ng/L, mean)                 | 0.34                 | n.d.  | -      | 0.28 | 0.012 | 0.030 | (Ling et al., 2021)     |
|                       |               | E-waste sediment (ng/g, mean)              | 23.0                 | 1.60  | -      | 1.30 | 0.02  | 32.0  |                         |
| Hanoi Vietnam         | 2018          | Urban house dust (ng/g)                    | -                    | -     | -      | -    | 0.25  | 1.10  | (Hoang et al., 2021)    |
| Ontario, Canada       | 2017          | E-waste workshop floor dust                | -                    | 693   | 1940   | -    | -     | -     | (Nguyen et al., 2019)   |
|                       |               | E-waste workshop workbench dust            | -                    | 738   | 2710   | -    | -     | -     |                         |
| Dalian, North China   | 2016-2017     | PM <sub>2.5</sub> (pg/m <sup>3</sup> )     | 4.43                 | 0.20  | 0.66   | 0.20 | 0.06  | 0.10  | (Wang et al., 2020)     |
|                       |               | Gas (pg/m <sup>3</sup> )                   | 1.27                 | 0.19  | 1.22   | 1.07 | 0.34  | 0.07  |                         |
| Belgium               | 2016-2017     | Indoor house dust (ng/g)                   | -                    | -     | -      | -    | 0.02  | 0.87  | (Torre et al., 2020)    |
| Spain                 | 2016-2017     | Indoor house dust (ng/g)                   | -                    | -     | -      | -    | 0.03  | 1.58  |                         |
| Italy                 | 2016-2017     | Indoor house dust (ng/g)                   | -                    | -     | -      | -    | 0.06  | 1.67  |                         |
|                       |               | Indoor floor dust                          | -                    | 4.10  | 58.0   | -    | -     | 1.30  |                         |
| Bui Dau, Vietnam      | 2015          | E-waste workshop dust (ng/g, average)      | 1500                 | -     | -      | -    | -     | 1300  | (Wannomai et al., 2020) |
| Longtang, South China | 2013          | E-waste recycling sites indoor dust (ng/g) | -                    | 7.50  | 88.0   | -    | -     | 28.0  | (Zheng et al., 2015)    |
| Dali,                 | 2013          | E-waste recycling sites                    | -                    | 36.0  | 193    | -    | -     | 40.0  |                         |



| Area               | Sampling time | Matrix (units)                             | Median concentration |       |        |      |      |       | Reference           |
|--------------------|---------------|--------------------------------------------|----------------------|-------|--------|------|------|-------|---------------------|
|                    |               |                                            | HBBZ                 | EHTBB | BEHTBP | PBT  | PBEB | BTBPE |                     |
| South China        |               | indoor dust (ng/g)                         |                      |       |        |      |      |       |                     |
| Guiyu, South China | 2013          | E-waste recycling sites indoor dust (ng/g) | -                    | 60.0  | 49.0   | -    | -    | 3870  |                     |
| Beijing            | 2012-2013     | Indoor Elevated surface dust (ng/g)        | -                    | 3.50  | 30.0   | -    | -    | 1.70  | (Bu et al., 2019)   |
| South China        | 2007          | E-waste house dust (ng/g)                  | 21.0                 | -     | -      | 0.79 | 1.83 | 20.0  | (Wang et al., 2010) |
|                    | 2008-2009     | Urban house dust (ng/g)                    | 18.1                 | -     | -      | 1.52 | 0.15 | 6.47  |                     |
| Belgian            | 2008          | Homes dust (ng/g)                          | -                    | 1.00  | -      | -    | -    | 2.00  | (Ali et al., 2011)  |
| UK                 | 2008          | Schools dust (ng/g)                        | -                    | 25.0  | -      | -    | -    | 9.00  |                     |

Notes: n.d. means not detected; the dash means the compound is not measured

Table S5. Component matrix of principal component analysis.

|                | Component |        |        |
|----------------|-----------|--------|--------|
|                | 1         | 2      | 3      |
| HBBZ           | 0.881     | 0.032  | 0.032  |
| EHTBB          | 0.460     | -0.004 | 0.138  |
| BEHTBP         | 0.144     | 0.627  | 0.682  |
| PBT            | 0.675     | -0.577 | 0.434  |
| PBEB           | 0.590     | -0.626 | 0.478  |
| BTBPE          | 0.105     | 0.695  | 0.632  |
| $\alpha$ -HBCD | 0.734     | 0.146  | -0.419 |
| $\beta$ -HBCD  | 0.657     | 0.266  | -0.518 |
| $\gamma$ -HBCD | 0.670     | 0.429  | -0.275 |
| Eigenvalues*   | 3.244     | 1.878  | 1.821  |
| Variances (%)  | 36.04     | 20.87  | 20.24  |

\* Eigenvalues  $\geq 1.0$  were used to construct the PCA model.

Table S6. The estimated daily intake of NBFRs and HBCDs via dust ingestion pathway (ng/kg bw/d).

| Areas           | DW1      |          |          |          | DW2      |          |          |          | WO       |          |          |          | RAO      |          |          |          |
|-----------------|----------|----------|----------|----------|----------|----------|----------|----------|----------|----------|----------|----------|----------|----------|----------|----------|
| Gender          | Male     |          | Female   |          |
| EDIs            | Average  | High     |
| HHBZ            | 1.21E-03 | 8.36E-03 | 1.39E-03 | 9.56E-03 | -*       | 1.14E-01 | -        | 1.30E-01 | -        | 1.31E-02 | -        | 1.02E-02 | -        | -        | -        | -        |
| EHTBB           | 1.07E-03 | 1.88E-03 | 1.22E-03 | 2.15E-03 | 1.80E-04 | 1.34E-03 | 2.06E-04 | 1.54E-03 | 8.91E-05 | 3.94E-04 | 6.94E-05 | 3.07E-04 | 7.67E-05 | 3.32E-04 | 5.97E-05 | 2.59E-04 |
| BEHTBP          | 9.73E-03 | 3.32E-02 | 1.11E-02 | 3.80E-02 | 1.12E-02 | 4.11E-02 | 1.28E-02 | 4.70E-02 | 2.55E-03 | 9.72E-03 | 1.99E-03 | 7.57E-03 | 3.32E-04 | 4.27E-02 | 2.59E-04 | 3.32E-02 |
| PBT             | 7.89E-04 | 1.83E-03 | 9.02E-04 | 2.09E-03 | 3.12E-04 | 3.16E-03 | 3.56E-04 | 3.62E-03 | 6.68E-05 | 3.26E-03 | 5.21E-05 | 2.54E-03 | 7.16E-06 | 7.17E-05 | 5.58E-06 | 5.59E-05 |
| PBEB            | 1.05E-04 | 1.40E-04 | 1.20E-04 | 1.60E-04 | 1.01E-04 | 4.71E-04 | 1.15E-04 | 5.39E-04 | 3.64E-05 | 2.38E-03 | 2.84E-05 | 1.86E-03 | -        | -        | -        | -        |
| BTBPE           | 9.37E-04 | 4.81E-03 | 1.07E-03 | 5.50E-03 | 2.61E-03 | 1.10E-02 | 2.98E-03 | 1.26E-02 | 1.41E-04 | 3.13E-04 | 1.10E-04 | 2.44E-04 | 8.97E-05 | 6.61E-03 | 6.99E-05 | 5.15E-03 |
| $\Sigma$ 6NBFRs | 1.59E-02 | 3.73E-02 | 1.82E-02 | 4.26E-02 | 1.64E-02 | 1.54E-01 | 1.88E-02 | 1.76E-01 | 4.45E-03 | 2.56E-02 | 3.47E-03 | 2.00E-02 | 5.90E-04 | 4.96E-02 | 4.60E-04 | 3.86E-02 |
| $\alpha$ -HBCD  | 6.92E-03 | 3.22E-02 | 7.91E-03 | 3.68E-02 | 5.35E-03 | 4.17E-02 | 6.12E-03 | 4.77E-02 | 8.56E-04 | 9.52E-03 | 6.67E-04 | 7.42E-03 | 9.78E-05 | 8.96E-03 | 7.62E-05 | 6.98E-03 |
| $\beta$ -HBCD   | 2.40E-03 | 7.14E-03 | 2.75E-03 | 8.17E-03 | 7.59E-04 | 1.13E-02 | 8.68E-04 | 1.30E-02 | 2.92E-04 | 1.64E-03 | 2.28E-04 | 1.28E-03 | 1.93E-05 | 4.57E-03 | 1.51E-05 | 3.56E-03 |
| $\gamma$ -HBCD  | 2.16E-02 | 5.41E-02 | 2.46E-02 | 6.19E-02 | 4.14E-03 | 2.74E-01 | 4.74E-03 | 3.13E-01 | 7.44E-04 | 4.56E-03 | 5.80E-04 | 3.55E-03 | 9.85E-05 | 9.86E-04 | 7.67E-05 | 7.69E-04 |
| $\Sigma$ 3HBCDs | 3.70E-02 | 6.57E-02 | 4.23E-02 | 7.51E-02 | 1.12E-02 | 3.24E-01 | 1.29E-02 | 3.70E-01 | 2.08E-03 | 1.25E-02 | 1.62E-03 | 9.76E-03 | 1.76E-04 | 1.39E-02 | 1.38E-04 | 1.09E-02 |

\*the dash means the median concentration is not available.

Table S7. The estimated daily intake of NBFRs and HBCDs via dust inhalation pathway (ng/kg bw/d).

| Areas   | DW1      |          |          |          | DW2      |          |          |          | WO       |          |          |          | RAO      |          |          |          |
|---------|----------|----------|----------|----------|----------|----------|----------|----------|----------|----------|----------|----------|----------|----------|----------|----------|
| Gender  | Male     |          | Female   |          |
| EDIs    | Average  | High     |
| HBBZ    | 5.93E-07 | 4.09E-06 | 6.78E-07 | 4.68E-06 | -        | 5.56E-05 | -        | 6.35E-05 | -        | 6.42E-06 | -        | 5.01E-06 | -        | -        | -        | -        |
| EHTBB   | 5.22E-07 | 9.21E-07 | 5.96E-07 | 1.05E-06 | 8.79E-08 | 6.58E-07 | 1.01E-07 | 7.52E-07 | 4.36E-08 | 1.92E-07 | 3.39E-08 | 1.50E-07 | 3.75E-08 | 1.63E-07 | 2.92E-08 | 1.27E-07 |
| BEHTBP  | 4.76E-06 | 1.62E-05 | 5.44E-06 | 1.86E-05 | 5.48E-06 | 2.01E-05 | 6.26E-06 | 2.30E-05 | 1.25E-06 | 4.75E-06 | 9.72E-07 | 3.70E-06 | 1.63E-07 | 2.09E-05 | 1.27E-07 | 1.63E-05 |
| PBT     | 3.86E-07 | 8.95E-07 | 4.41E-07 | 1.02E-06 | 1.52E-07 | 1.55E-06 | 1.74E-07 | 1.77E-06 | 3.27E-08 | 1.60E-06 | 2.55E-08 | 1.24E-06 | 3.50E-09 | 3.51E-08 | 2.73E-09 | 2.73E-08 |
| PBEB    | 5.11E-08 | 6.86E-08 | 5.85E-08 | 7.85E-08 | 4.93E-08 | 2.30E-07 | 5.64E-08 | 2.63E-07 | 1.78E-08 | 1.16E-06 | 1.39E-08 | 9.07E-07 | -        | -        | -        | -        |
| BTBPE   | 4.58E-07 | 2.35E-06 | 5.24E-07 | 2.69E-06 | 1.28E-06 | 5.40E-06 | 1.46E-06 | 6.18E-06 | 6.88E-08 | 1.53E-07 | 5.36E-08 | 1.19E-07 | 4.39E-08 | 3.23E-06 | 3.42E-08 | 2.52E-06 |
| Σ6NBFRs | 7.76E-06 | 1.82E-05 | 8.88E-06 | 2.08E-05 | 8.02E-06 | 7.54E-05 | 9.18E-06 | 8.63E-05 | 2.18E-06 | 1.25E-05 | 1.70E-06 | 9.77E-06 | 2.89E-07 | 2.43E-05 | 2.25E-07 | 1.89E-05 |
| α-HBCD  | 3.38E-06 | 1.58E-05 | 3.87E-06 | 1.80E-05 | 2.62E-06 | 2.04E-05 | 2.99E-06 | 2.33E-05 | 4.19E-07 | 4.66E-06 | 3.26E-07 | 3.63E-06 | 4.78E-08 | 4.38E-06 | 3.73E-08 | 3.41E-06 |
| β-HBCD  | 1.18E-06 | 3.49E-06 | 1.34E-06 | 3.99E-06 | 3.71E-07 | 5.54E-06 | 4.25E-07 | 6.34E-06 | 1.43E-07 | 8.01E-07 | 1.11E-07 | 6.25E-07 | 9.45E-09 | 2.23E-06 | 7.36E-09 | 1.74E-06 |
| γ-HBCD  | 1.05E-05 | 2.65E-05 | 1.21E-05 | 3.03E-05 | 2.03E-06 | 1.34E-04 | 2.32E-06 | 1.53E-04 | 3.64E-07 | 2.23E-06 | 2.84E-07 | 1.74E-06 | 4.81E-08 | 4.82E-07 | 3.75E-08 | 3.76E-07 |
| Σ3HBCDs | 1.81E-05 | 3.21E-05 | 2.07E-05 | 3.67E-05 | 5.50E-06 | 1.58E-04 | 6.28E-06 | 1.81E-04 | 1.02E-06 | 6.12E-06 | 7.92E-07 | 4.77E-06 | 8.63E-08 | 6.81E-06 | 6.72E-08 | 5.31E-06 |

\*the dash means the median concentration is not available.

Table S8. The estimated daily intake of NBFRs and HBCDs via dust dermal contact pathway (ng/kg bw/d).

| Areas           | DW1      |          |          |          | DW2      |          |          |          | WO       |          |          |          | RAO      |          |          |          |
|-----------------|----------|----------|----------|----------|----------|----------|----------|----------|----------|----------|----------|----------|----------|----------|----------|----------|
| Gender          | Male     |          | Female   |          |
| EDIs            | Average  | High     |
| HBBZ            | 8.04E-04 | 5.54E-03 | 8.39E-04 | 5.78E-03 | -        | 7.53E-02 | -        | 7.86E-02 | -        | 8.70E-03 | -        | 6.19E-03 | -        | -        | -        | -        |
| EHTBB           | 7.07E-04 | 1.25E-03 | 7.38E-04 | 1.30E-03 | 1.19E-04 | 8.91E-04 | 1.24E-04 | 9.30E-04 | 5.90E-05 | 2.61E-04 | 4.20E-05 | 1.85E-04 | 5.08E-05 | 2.20E-04 | 3.61E-05 | 1.57E-04 |
| BEHTBP          | 6.44E-03 | 2.20E-02 | 6.73E-03 | 2.30E-02 | 7.42E-03 | 2.72E-02 | 7.75E-03 | 2.84E-02 | 1.69E-03 | 6.44E-03 | 1.20E-03 | 4.58E-03 | 2.20E-04 | 2.83E-02 | 1.57E-04 | 2.01E-02 |
| PBT             | 5.22E-04 | 1.21E-03 | 5.46E-04 | 1.27E-03 | 2.06E-04 | 2.09E-03 | 2.16E-04 | 2.19E-03 | 4.43E-05 | 2.16E-03 | 3.15E-05 | 1.54E-03 | 4.74E-06 | 4.75E-05 | 3.37E-06 | 3.38E-05 |
| PBEB            | 6.93E-05 | 9.30E-05 | 7.23E-05 | 9.71E-05 | 6.69E-05 | 3.12E-04 | 6.98E-05 | 3.26E-04 | 2.41E-05 | 1.58E-03 | 1.72E-05 | 1.12E-03 | -        | -        | -        | -        |
| BTBPE           | 6.21E-04 | 3.19E-03 | 6.48E-04 | 3.33E-03 | 1.73E-03 | 7.32E-03 | 1.81E-03 | 7.64E-03 | 9.31E-05 | 2.07E-04 | 6.63E-05 | 1.48E-04 | 5.94E-05 | 4.38E-03 | 4.23E-05 | 3.12E-03 |
| $\Sigma$ 6NBFRs | 1.05E-02 | 2.47E-02 | 1.10E-02 | 2.58E-02 | 1.09E-02 | 1.02E-01 | 1.13E-02 | 1.07E-01 | 2.95E-03 | 1.70E-02 | 2.10E-03 | 1.21E-02 | 3.91E-04 | 3.29E-02 | 2.78E-04 | 2.34E-02 |
| $\alpha$ -HBCD  | 4.58E-03 | 2.13E-02 | 4.79E-03 | 2.23E-02 | 3.54E-03 | 2.76E-02 | 3.70E-03 | 2.89E-02 | 5.67E-04 | 6.31E-03 | 4.04E-04 | 4.49E-03 | 6.48E-05 | 5.94E-03 | 4.61E-05 | 4.22E-03 |
| $\beta$ -HBCD   | 1.59E-03 | 4.73E-03 | 1.66E-03 | 4.94E-03 | 5.03E-04 | 7.51E-03 | 5.25E-04 | 7.84E-03 | 1.94E-04 | 1.09E-03 | 1.38E-04 | 7.72E-04 | 1.28E-05 | 3.03E-03 | 9.10E-06 | 2.15E-03 |
| $\gamma$ -HBCD  | 1.43E-02 | 3.58E-02 | 1.49E-02 | 3.74E-02 | 2.74E-03 | 1.81E-01 | 2.86E-03 | 1.89E-01 | 4.93E-04 | 3.02E-03 | 3.51E-04 | 2.15E-03 | 6.52E-05 | 6.53E-04 | 4.64E-05 | 4.65E-04 |
| $\Sigma$ 3HBCDs | 2.45E-02 | 4.35E-02 | 2.56E-02 | 4.54E-02 | 7.44E-03 | 2.14E-01 | 7.77E-03 | 2.24E-01 | 1.38E-03 | 8.29E-03 | 9.79E-04 | 5.90E-03 | 1.17E-04 | 9.23E-03 | 8.32E-05 | 6.57E-03 |

\*the dash means the median concentration is not available.

Table S9. The calculated hazard quotients for NBFRs and HBCDs

| Target Compounds | RfD*<br>(ng/kg bw/d) | EDI <sub>sum</sub> |          |          |          | HQs      |          |          |          |
|------------------|----------------------|--------------------|----------|----------|----------|----------|----------|----------|----------|
|                  |                      | Male               |          | Female   |          | Male     |          | Female   |          |
|                  |                      | Average            | High     | Average  | High     | Average  | High     | Average  | High     |
| HBBZ             | 100                  | 2.02E-03           | 1.39E-02 | 2.23E-03 | 1.54E-02 | 2.02E-05 | 1.39E-04 | 2.23E-05 | 1.54E-04 |
| EHTBB            | 20000                | 1.77E-03           | 3.13E-03 | 1.96E-03 | 3.46E-03 | 8.87E-08 | 1.57E-07 | 9.79E-08 | 1.73E-07 |
| BEHTBP           | 20000                | 1.62E-02           | 5.53E-02 | 1.79E-02 | 6.10E-02 | 8.09E-07 | 2.76E-06 | 8.93E-07 | 3.05E-06 |
| PBT              | 100                  | 1.31E-03           | 3.04E-03 | 1.45E-03 | 3.36E-03 | 1.31E-05 | 3.04E-05 | 1.45E-05 | 3.36E-05 |
| PBEB             | 100                  | 1.74E-04           | 2.33E-04 | 1.92E-04 | 2.58E-04 | 1.74E-06 | 2.33E-06 | 1.92E-06 | 2.58E-06 |
| BTBPE            | 243000               | 1.56E-03           | 8.00E-03 | 1.72E-03 | 8.83E-03 | 6.42E-09 | 3.29E-08 | 7.08E-09 | 3.64E-08 |
| Σ6NBFRs          |                      | 2.64E-02           | 6.20E-02 | 2.91E-02 | 6.84E-02 | 3.59E-05 | 1.75E-04 | 3.97E-05 | 1.93E-04 |
| α-HBCD           | 200000               | 1.15E-02           | 5.36E-02 | 1.27E-02 | 5.91E-02 | 5.75E-08 | 2.68E-07 | 6.35E-08 | 2.96E-07 |
| β-HBCD           | 200000               | 4.00E-03           | 1.19E-02 | 4.41E-03 | 1.31E-02 | 2.00E-08 | 5.94E-08 | 2.21E-08 | 6.56E-08 |
| γ-HBCD           | 200000               | 3.58E-02           | 9.00E-02 | 3.96E-02 | 9.93E-02 | 1.79E-07 | 4.50E-07 | 1.98E-07 | 4.97E-07 |
| Σ3HBCDs          |                      | 6.15E-02           | 1.09E-01 | 6.79E-02 | 1.21E-01 | 2.57E-07 | 7.77E-07 | 2.83E-07 | 8.58E-07 |

\*RfD values are all from Integrated Risk Information System (IRIS) in EPA (<https://www.epa.gov/ncea/iris/index.html>).  
EDI<sub>sum</sub> means total EDI of dust ingestion, inhalation, and dermal contact pathways.

## References

- EPA. Integrated Risk Information System, 1991; ([www.epa.gov/ncea/iris/index.html](http://www.epa.gov/ncea/iris/index.html)) (accessed: August 15, 2008).
- ALI N, HARRAD S, GOOSEY E, et al. 2011. "Novel" brominated flame retardants in Belgian and UK indoor dust: implications for human exposure. *Chemosphere* [J], 83: 1360-1365.
- BU Q, WU D, XIA J, et al. 2019. Polybrominated diphenyl ethers and novel brominated flame retardants in indoor dust of different microenvironments in Beijing, China. *Environment International* [J], 122: 159-167.
- CRAES 2015. The Chinese Research Academy of Environmental Sciences. Highlights of the Chinese Exposure Factors Handbook (Adults) [M]. Academic Press, ISBN: 978-0-12-803125-4.
- HOANG M T T, ANH H Q, KADOKAMI K, et al. 2021. Contamination status, emission sources, and human health risk of brominated flame retardants in urban indoor dust from Hanoi, Vietnam: the replacement of legacy polybrominated diphenyl ether mixtures by alternative formulations. *Environmental Science and Pollution Research* [J], 28: 43885-43896.
- LING S, LU C, PENG C, et al. 2021. Characteristics of legacy and novel brominated flame retardants in water and sediment surrounding two e-waste dismantling regions in Taizhou, eastern China. *Science of the Total Environment* [J], 794: 148744.
- LING S, ZHOU S, TAN J, et al. 2022. Brominated flame retardants (BFRs) in sediment from a typical e-waste dismantling region in Southern China: Occurrence, spatial distribution, composition profiles, and ecological risks. *Science of the Total Environment* [J], 824: 153813.
- NGUYEN L V, DIAMOND M L, VENIER M, et al. 2019. Exposure of Canadian electronic waste dismantlers to flame retardants. *Environ Int* [J], 129: 95-104.
- TORRE A D L, NAVARRO I, SANZ P, et al. 2020. Organophosphate compounds, polybrominated diphenyl ethers and novel brominated flame retardants in European indoor house dust: Use, evidence for replacements and assessment of human exposure. *Journal of Hazardous Materials* [J], 382: 121009.
- USEPA 2011. Exposure factors handbook [M], <https://www.epa.gov/expobox/exposure-factors-handbook-2011-edition>.
- WANG J, MA Y, CHEN S, et al. 2010. Brominated flame retardants in house dust from e-waste recycling and urban areas in South China: implications on human exposure. *Environment International* [J], 36: 535-541.
- WANG Y, ZHANG Y, TAN F, et al. 2020. Characteristics of halogenated flame retardants in the atmosphere of Dalian, China. *Atmospheric Environment* [J], 223.
- WANNOMAI T, MATSUKAMI H, UCHIDA N, et al. 2020. Bioaccessibility and exposure assessment of flame retardants via dust ingestion for workers in e-waste processing workshops in northern Vietnam. *Chemosphere* [J], 251: 126632.
- ZHANG Q, LI X, WANG Y, et al. 2021. Occurrence of novel organophosphate esters derived from organophosphite antioxidants in an e-waste dismantling area: Associations between hand wipes and dust. *Environment International* [J], 157: 106860.
- ZHAO L, LU Y, ZHU H, et al. 2022. E-waste dismantling-related occupational and routine exposure to melamine and its derivatives: Estimating exposure via dust ingestion and hand-to-mouth contact. *Environment International* [J], 165: 107299.

ZHENG X, XU F, CHEN K, et al. 2015. Flame retardants and organochlorines in indoor dust from several e-waste recycling sites in South China: composition variations and implications for human exposure. *Environ Int [J]*, 78: 1-7.
